# Supplementary material
Source: MDPI journal article supplement (https://www.mdpi.com/2073-4441/15/20/3678)
Supplement: s1 [file s1 › water-2536068-supplementary.pdf]

# Supplementary Materials

Table S1. The coefficients of variation of F-high groundwater.

| F-High Groundwater |                   | Coefficients of Variation |
|--------------------|-------------------|---------------------------|
| PW                 | PW                | 0.50                      |
|                    | FW                | 0.56                      |
|                    | Construction land | 0.83                      |
|                    | Cultivated land   | 0.50                      |
|                    | Woodland          | 0.39                      |
|                    | Grassland         | 0.68                      |
|                    | Bare land         | 0.82                      |
| FW                 | Construction land | 0.49                      |
|                    | Cultivated land   | 0.54                      |
|                    | Woodland          | 0.55                      |
|                    | Grassland         | 0.67                      |

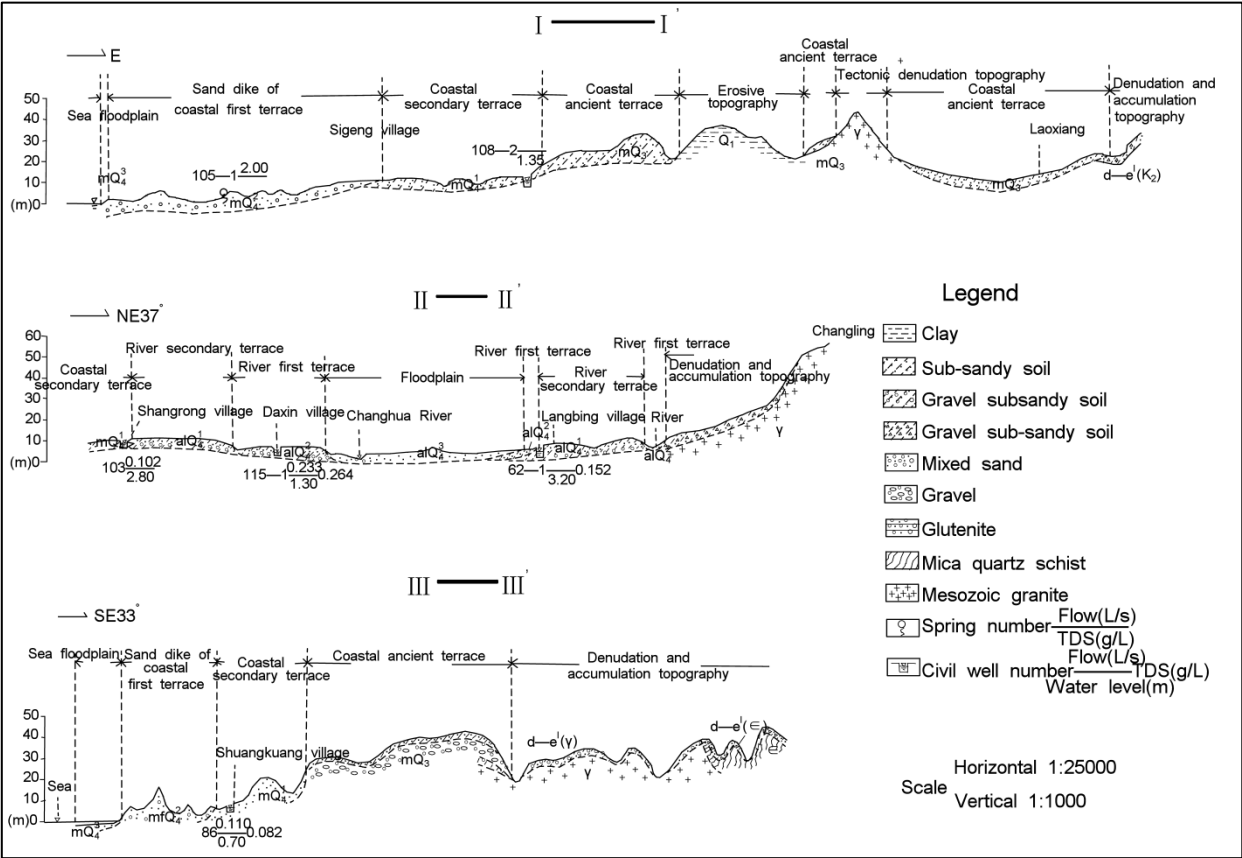

Figure S1. Hydrogeological profile of the study area.

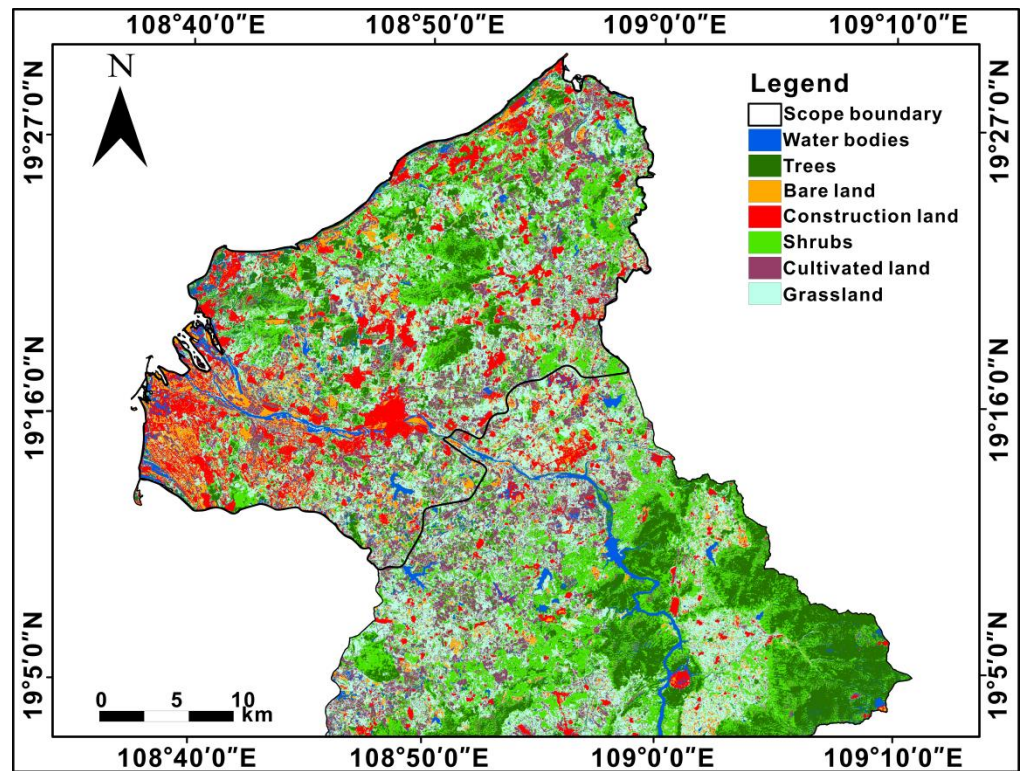

Figure S2. Land-use types in the study area.
